# Supplementary material for: Mechanistic Investigation of Bone Marrow Suppression Associated with Palbociclib and its Differentiation from Cytotoxic Chemotherapies
Source: Oxford University Press journal article supplement (doi:10.1158/1078-0432.ccr-15-1421), 2015-12-02
Supplement: 10780432ccr151421-sup-151338_2_supp_3196983_nwnn1h.docx [file 10780432ccr151421-sup-151338_2_supp_3196983_nwnn1h.docx]

**Supplementary References**

1. Palbociclib New Drug Application - Summary of Clinical Pharmacology, 2014.
2. Taxol injection label on FDA homepage, reference ID: 2939751

[<http://www.accessdata.fda.gov/drugsatfda_docs/label/2011/020262s049lbl.pdf>]

1. Barpe DR, Rosa DD, Froehlich PE. Pharmacokinetic evaluation of doxorubicin plasma levels in normal and overweight patients with breast cancer and simulation of dose adjustment by different indexes of body mass. Europ J Pharm Sci 2010;41:458-63.
2. Falsodex injection label on FDA homepage, reference ID: 3014913

[<http://www.accessdata.fda.gov/drugsatfda_docs/label/2011/021344s015lbl.pdf>]
